# Supplementary material
Source: PubMed Central journal article supplement (PMC10658788)
Supplement: joces-135-260594-s1.pdf [file joces-135-260594-s1.pdf]

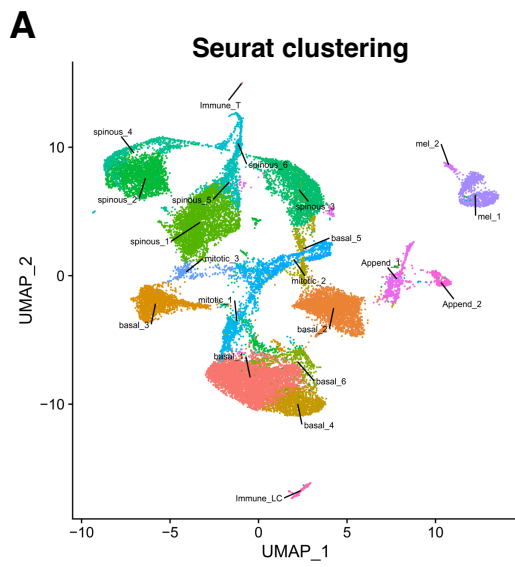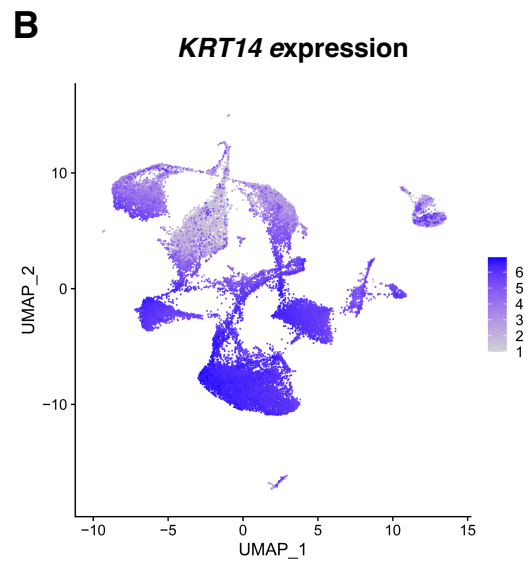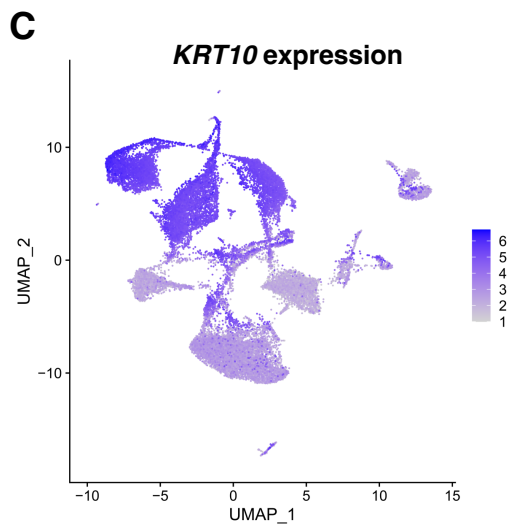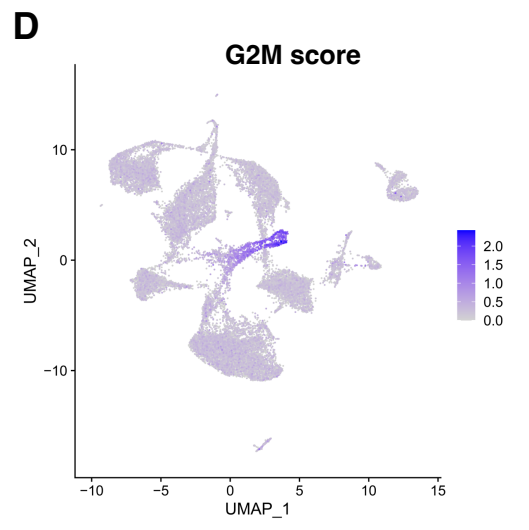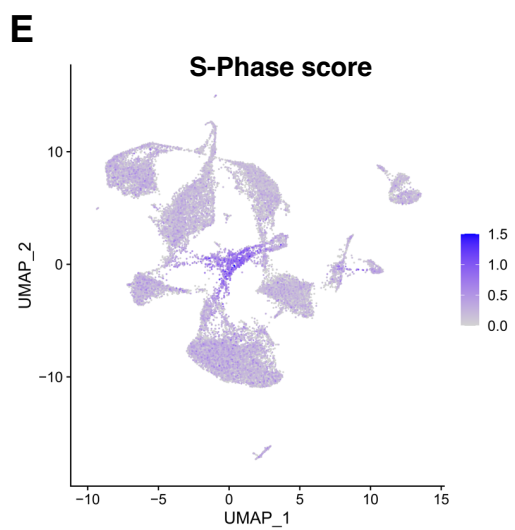

**Fig. S1. Single cell RNA-seq analysis of healthy human trunk skin.**

Uniform Manifold Approximation and Projections (UMAPs) depicting: (A) assigned Seurat clusters; (B) *KRT14* expression levels; (C) *KRT10* expression levels; (D) composite 'G2/M score' and (E) composite 'S Phase score' across all cells in this data set with informative content (n= 27,452 cells, partitioned into 21 clusters).

Data set published by Cheng et al. (2018) and reanalyzed using a standard Seurat pipeline (see 'Methods' section). Data set publicly available at EGAS00001002927.

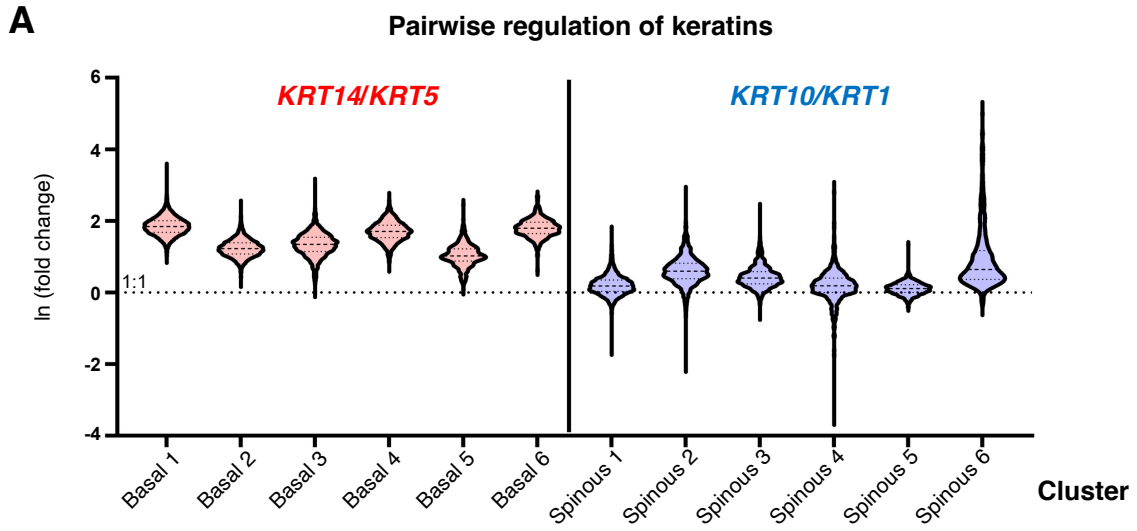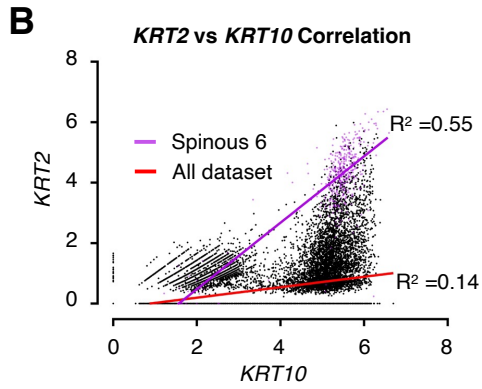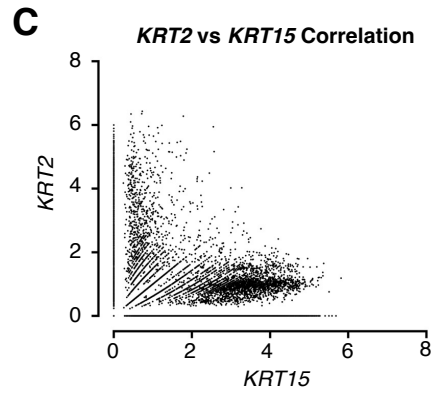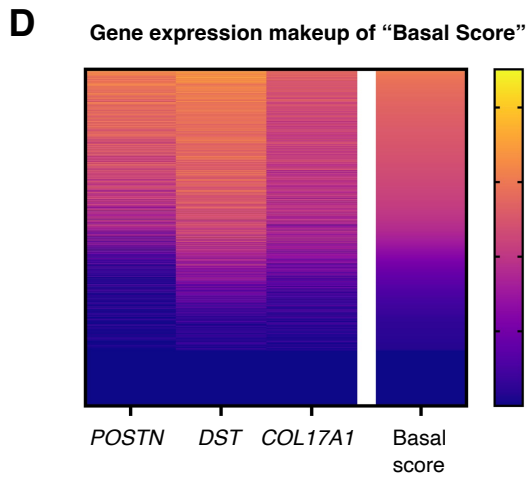

**Fig. S2. Additional analyses of scRNAseq data from human trunk skin.**

(A) Violin plot of the ratio of *KRT14* / *KRT5* reads in 'Basal1-6' clusters (left), and the ratio of *KRT10* / *KRT1* reads in 'Spinous1-6' clusters (right). A dashed line across the Y-axis depicts a 1:1 balance between the type I and II keratin partners. (B, C) Correlations between specific type I and type II keratin genes across the entire array of epidermal keratinocytes (n= 24,979 cells). (B) *KRT2* versus *KRT10*. Red lines represent linear correlations, and  $r^2$  values are reported (n=24,979 cells). Magenta line represent linear correlation for keratinocytes in the 'Spinous6' cluster (n= 408 cells). (C) *KRT2* versus *KRT15*, which provides the equivalent of a negative control in this analysis of pairwise regulation in epidermis. (D) Heatmap relating expression of *POSTN*, *DST*, and *COL17A1* across the entire array of 24,979 keratinocytes. These three genes were selected to calculate a composite "Basal Score", shown at right. See Suppl. Fig. 1 for source data and main text for additional details. Data set published by Cheng et al. (2018) and reanalyzed using a standard Seurat pipeline (see 'Methods' section). Data set publicly available at EGAS00001002927.

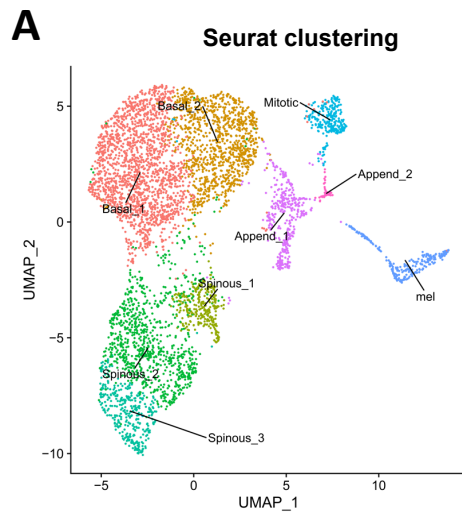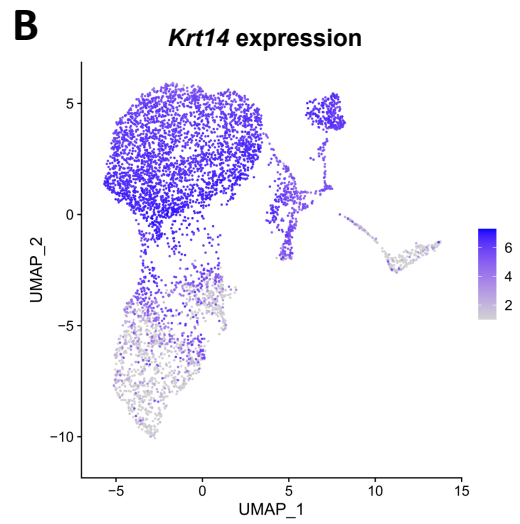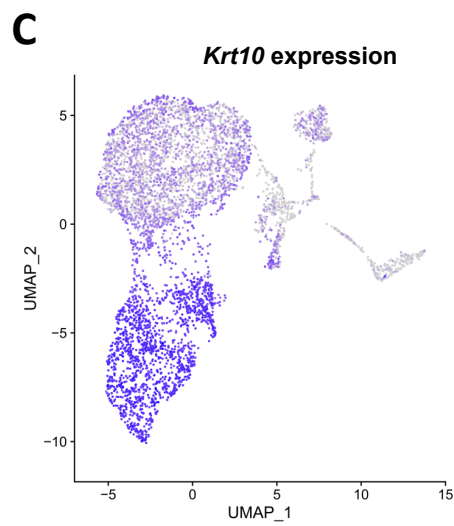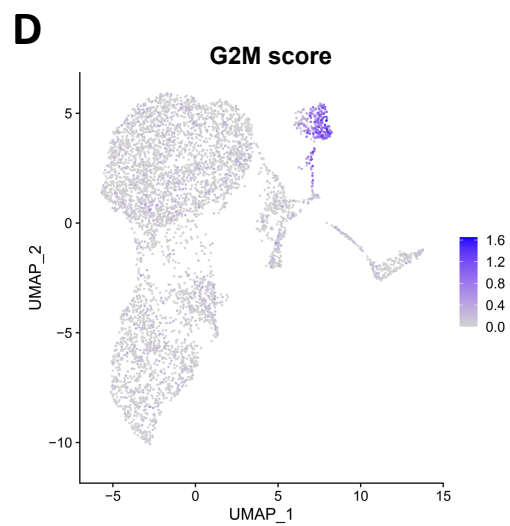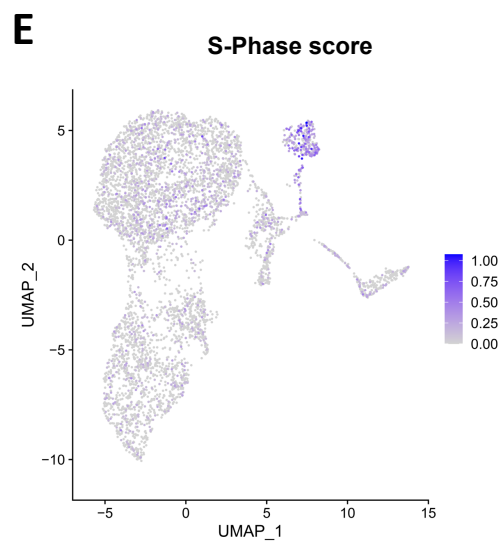

**Fig. S3. Single cell RNA-seq analysis of healthy mouse ear skin.**

(A-D) UMAPs depicting: (A) assigned Seurat clusters; (B) *Krt14* expression levels; (C) *Krt10* expression levels; (D) composite 'G2/M Score' and (E) composite 'S Phase Score' across all cells in this data set (n=5,446 cells with informative content, partitioned into 9 clusters). Data set published by Lukowski et al. (2018) and reanalyzed using a standard Seurat pipeline (see 'Methods' section). Data set publicly available at E-MTAB-6429.

## Suppl. Figure 4

Cohen, Johnson et al.

Mouse ear skin data set

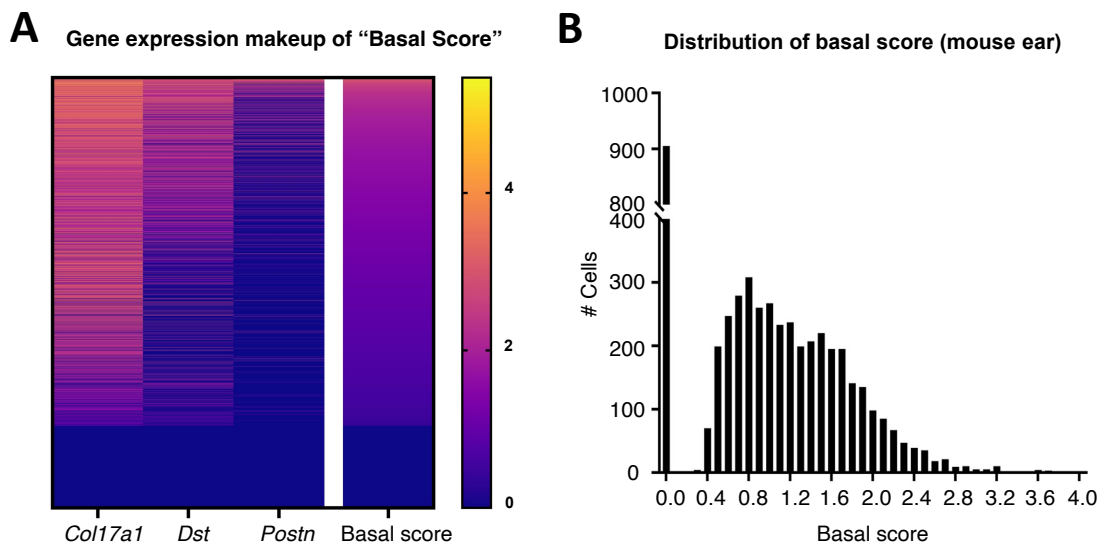

### Fig. S4. Additional analyses of scRNAseq data from mouse ear skin.

(A) Heatmap relating expression of *Postn*, *Dst*, and *Col17a1* across the entire array of 4,761 mouse skin epidermal keratinocytes. These three genes were selected to calculate a 'Basal Score', shown at right. (B) Histogram reporting on the composite 'Basal Score' across the population of mouse skin epidermal keratinocytes. See Suppl. Fig. 3 for source data and main text for additional details. Data set published by Lukowski et al. (2018) and reanalyzed using a standard Seurat pipeline (see 'Methods' section). Data set publicly available at E-MTAB-6429.

**Table S1. Top 10 expressed genes in epidermal keratinocyte clusters.**

Human trunk skin data (complement to Fig. 1B). See Suppl. Fig. 1 for details. Keratin genes are shown in red lettering.

| Rank | Basal Clusters |              |              |              |              |              | Mitotic Clusters |              |              |
|------|----------------|--------------|--------------|--------------|--------------|--------------|------------------|--------------|--------------|
|      | Basal 1        | Basal 2      | Basal 3      | Basal 4      | Basal 5      | Basal 6      | Mitotic 1        | Mitotic 2    | Mitotic 3    |
| 1    | MALAT1         | MALAT1       | MALAT1       | MALAT1       | <b>KRT14</b> | MALAT1       | <b>KRT14</b>     | MALAT1       | <b>KRT14</b> |
| 2    | <b>KRT14</b>   | <b>KRT14</b> | <b>KRT14</b> | <b>KRT14</b> | MALAT1       | <b>KRT14</b> | MALAT1           | <b>KRT14</b> | MALAT1       |
| 3    | EEF1A1         | EEF1A1       | EEF1A1       | EEF1A1       | EEF1A1       | EEF1A1       | EEF1A1           | PTMA         | <b>KRT5</b>  |
| 4    | CXCL14         | <b>KRT5</b>  | <b>KRT5</b>  | CXCL14       | <b>KRT5</b>  | CXCL14       | <b>KRT5</b>      | EEF1A1       | EEF1A1       |
| 5    | <b>KRT5</b>    | CXCL14       | CXCL14       | <b>KRT15</b> | PTMA         | <b>KRT5</b>  | <b>KRT10</b>     | <b>KRT5</b>  | PTMA         |
| 6    | PTMA           | PTMA         | PTMA         | <b>KRT5</b>  | B2M          | PTMA         | PTMA             | B2M          | MT1X         |
| 7    | TMSB4X         | TPT1         | B2M          | PTMA         | <b>KRT10</b> | TMSB4X       | B2M              | <b>KRT10</b> | B2M          |
| 8    | B2M            | B2M          | TPT1         | TMSB4X       | TPT1         | B2M          | PERP             | H3F3B        | TPT1         |
| 9    | PERP           | TMSB4X       | TMSB4X       | B2M          | MT1X         | NFKBIA       | <b>KRT1</b>      | TMSB4X       | PERP         |
| 10   | H3F3B          | H3F3B        | JUN          | H3F3B        | DMKN         | PERP         | DMKN             | TUBA1B       | DMKN         |

  

| Spinous Clusters |              |              |              |              |              |              |
|------------------|--------------|--------------|--------------|--------------|--------------|--------------|
| Rank             | Spinous 1    | Spinous 2    | Spinous 3    | Spinous 4    | Spinous 5    | Spinous 6    |
| 1                | MALAT1       | MALAT1       | MALAT1       | MALAT1       | MALAT1       | MALAT1       |
| 2                | <b>KRT10</b> | <b>KRT10</b> | <b>KRT10</b> | <b>KRT10</b> | <b>KRT10</b> | <b>KRT10</b> |
| 3                | <b>KRT1</b>  | EEF1A1       | EEF1A1       | <b>KRT1</b>  | <b>KRT1</b>  | DMKN         |
| 4                | EEF1A1       | <b>KRT1</b>  | <b>KRT1</b>  | EEF1A1       | DMKN         | <b>KRT1</b>  |
| 5                | DMKN         | <b>KRT14</b> | DMKN         | DMKN         | EEF1A1       | CALML5       |
| 6                | B2M          | DMKN         | PTMA         | PERP         | KRTDAP       | <b>KRT2</b>  |
| 7                | PERP         | B2M          | B2M          | <b>KRT14</b> | PERP         | KRTDAP       |
| 8                | PTMA         | PERP         | TPT1         | B2M          | PTMA         | LOR          |
| 9                | TPT1         | PTMA         | PERP         | PTMA         | B2M          | EEF1A1       |
| 10               | DSP          | H3F3B        | H3F3B        | H3F3B        | TMSB4X       | PERP         |



**Table S2. Keratin expression levels across clusters.**

Human trunk skin data (complement to Fig. 1B). See Suppl. Fig. 1 for details.

| Keratin             | Basal Clusters |         |         |         |         |         | Mitotic Clusters |           |           |
|---------------------|----------------|---------|---------|---------|---------|---------|------------------|-----------|-----------|
|                     | Basal 1        | Basal 2 | Basal 3 | Basal 4 | Basal 5 | Basal 6 | Mitotic 1        | Mitotic 2 | Mitotic 3 |
| <b><i>KRT14</i></b> | 6.2            | 5.8     | 5.8     | 6       | 5.7     | 6.1     | 5.8              | 5.2       | 5.7       |
| <b><i>KRT5</i></b>  | 4.3            | 4.6     | 4.4     | 4.3     | 4.6     | 4.3     | 4.4              | 4.2       | 4.6       |
| <b><i>KRT15</i></b> | 2.8            | 2.7     | 3       | 4.3     | 1       | 3.1     | 0.9              | 1         | 0.5       |
| <b><i>KRT10</i></b> | 2.3            | 1.7     | 2       | 2.3     | 3.4     | 2.3     | 3.7              | 3.4       | 3.2       |
| <b><i>KRT1</i></b>  | 1.7            | 1.2     | 1.5     | 1.7     | 3.2     | 1.6     | 3.3              | 2.7       | 3.2       |
| <b><i>KRT2</i></b>  | 0.3            | 0.1     | 0.2     | 0.3     | 0.2     | 0.3     | 0.3              | 0.3       | 0.2       |

  

| Keratin             | Spinous Clusters |           |           |           |           |           |
|---------------------|------------------|-----------|-----------|-----------|-----------|-----------|
|                     | Spinous 1        | Spinous 2 | Spinous 3 | Spinous 4 | Spinous 5 | Spinous 6 |
| <b><i>KRT14</i></b> | 2                | 3.9       | 3         | 3.3       | 1.4       | 1.8       |
| <b><i>KRT5</i></b>  | 1.8              | 3.2       | 2.5       | 2.3       | 0.6       | 0.9       |
| <b><i>KRT15</i></b> | 0.2              | 0.7       | 0.3       | 0.7       | 0.2       | 0.3       |
| <b><i>KRT10</i></b> | 5                | 5.2       | 5         | 5.4       | 5.2       | 5.3       |
| <b><i>KRT1</i></b>  | 4.8              | 4.6       | 4.5       | 5.2       | 5.1       | 4.4       |
| <b><i>KRT2</i></b>  | 0.3              | 0.7       | 0.5       | 2.1       | 1.8       | 4.2       |

**Table S3. Pairwise correlations across clusters.**

Human trunk skin data (complement to Fig. 1, C, D and E). See Suppl. Fig. 1 for details.

| Pairwise R <sup>2</sup>   | Basal Clusters |         |         |         |         |         | Mitotic Clusters |           |           |
|---------------------------|----------------|---------|---------|---------|---------|---------|------------------|-----------|-----------|
|                           | Basal 1        | Basal 2 | Basal 3 | Basal 4 | Basal 5 | Basal 6 | Mitotic 1        | Mitotic 2 | Mitotic 3 |
| <b><i>KRT14-KRT5</i></b>  | 0.35           | 0.47    | 0.4     | 0.29    | 0.67    | 0.36    | 0.67             | 0.37      | 0.65      |
| <b><i>KRT10-KRT1</i></b>  | 0.04           | 0.02    | 0.03    | 0.04    | 0.52    | 0.11    | 0.59             | 0.7       | 0.51      |
| <b><i>KRT15-KRT5</i></b>  | 0              | 0.01    | 0       | 0.01    | 0.05    | 0.07    | 0.02             | 0.02      | 0.03      |
| <b><i>KRT15-KRT14</i></b> | 0.03           | 0.09    | 0       | 0.03    | 0.06    | 0.2     | 0.04             | 0.12      | 0.03      |
| <b><i>KRT2-KRT10</i></b>  | 0              | 0       | 0       | 0       | 0.03    | 0.01    | 0.02             | 0.04      | 0         |

  

| Pairwise R <sup>2</sup>   | Spinous Clusters |           |           |           |           |           | Entire Dataset |
|---------------------------|------------------|-----------|-----------|-----------|-----------|-----------|----------------|
|                           | Spinous 1        | Spinous 2 | Spinous 3 | Spinous 4 | Spinous 5 | Spinous 6 | All cells      |
| <b><i>KRT14-KRT5</i></b>  | 0.45             | 0.44      | 0.5       | 0.54      | 0.32      | 0.68      | 0.8            |
| <b><i>KRT10-KRT1</i></b>  | 0.46             | 0.42      | 0.51      | 0.82      | 0.65      | 0.35      | 0.84           |
| <b><i>KRT15-KRT5</i></b>  | 0.05             | 0.04      | 0         | 0.15      | 0.13      | 0.3       | 0.33           |
| <b><i>KRT15-KRT14</i></b> | 0.15             | 0.17      | 0.01      | 0.31      | 0.2       | 0.35      | 0.48           |
| <b><i>KRT2-KRT10</i></b>  | 0.01             | 0.01      | 0.07      | 0.08      | 0.03      | 0.56      | 0.14           |

**Table S4. Distribution of Custom G2/M Scores across clusters.**

Human trunk skin data (complement to Fig. 2B) and mouse ear data (complement to Fig. 3E). See Suppl. Figs. 1 and 3 for details.

| <b>Cluster</b> | <b># Cells</b> | <b>% of G2M scoring cells</b> |
|----------------|----------------|-------------------------------|
| basal_1        | 1              | 0%                            |
| basal_3        | 1              | 0%                            |
| basal_4        | 1              | 0%                            |
| mitotic_1      | 8              | 1%                            |
| mitotic_2      | 714            | 97%                           |
| mitotic_3      | 1              | 0%                            |
| spinous_1      | 1              | 0%                            |
| spinous_2      | 1              | 0%                            |
| spinous_3      | 1              | 0%                            |
| spinous_4      | 3              | 0%                            |
| spinous_5      | 2              | 0%                            |
| spinous_6      | 1              | 0%                            |
| <b>Total</b>   | <b>735</b>     |                               |

**G2M score cluster distribution (mouse ear skin data)**

| <b>Cluster</b> | <b>#Cells</b> | <b>% of G2M scoring Cells</b> |
|----------------|---------------|-------------------------------|
| basal_1        | 19            | 7%                            |
| basal_2        | 20            | 8%                            |
| mitotic        | 215           | 81%                           |
| spinous_1      | 4             | 2%                            |
| spinous_2      | 8             | 3%                            |
| spinous_3      | 0             | 0%                            |
| <b>Total</b>   | <b>266</b>    |                               |
